# Supplementary material for: Off-target effects of siRNA specific for GFP
Source: PubMed Central journal article supplement (PMC2443166; doi:10.1186/1471-2199-9-60), 2008-06-24

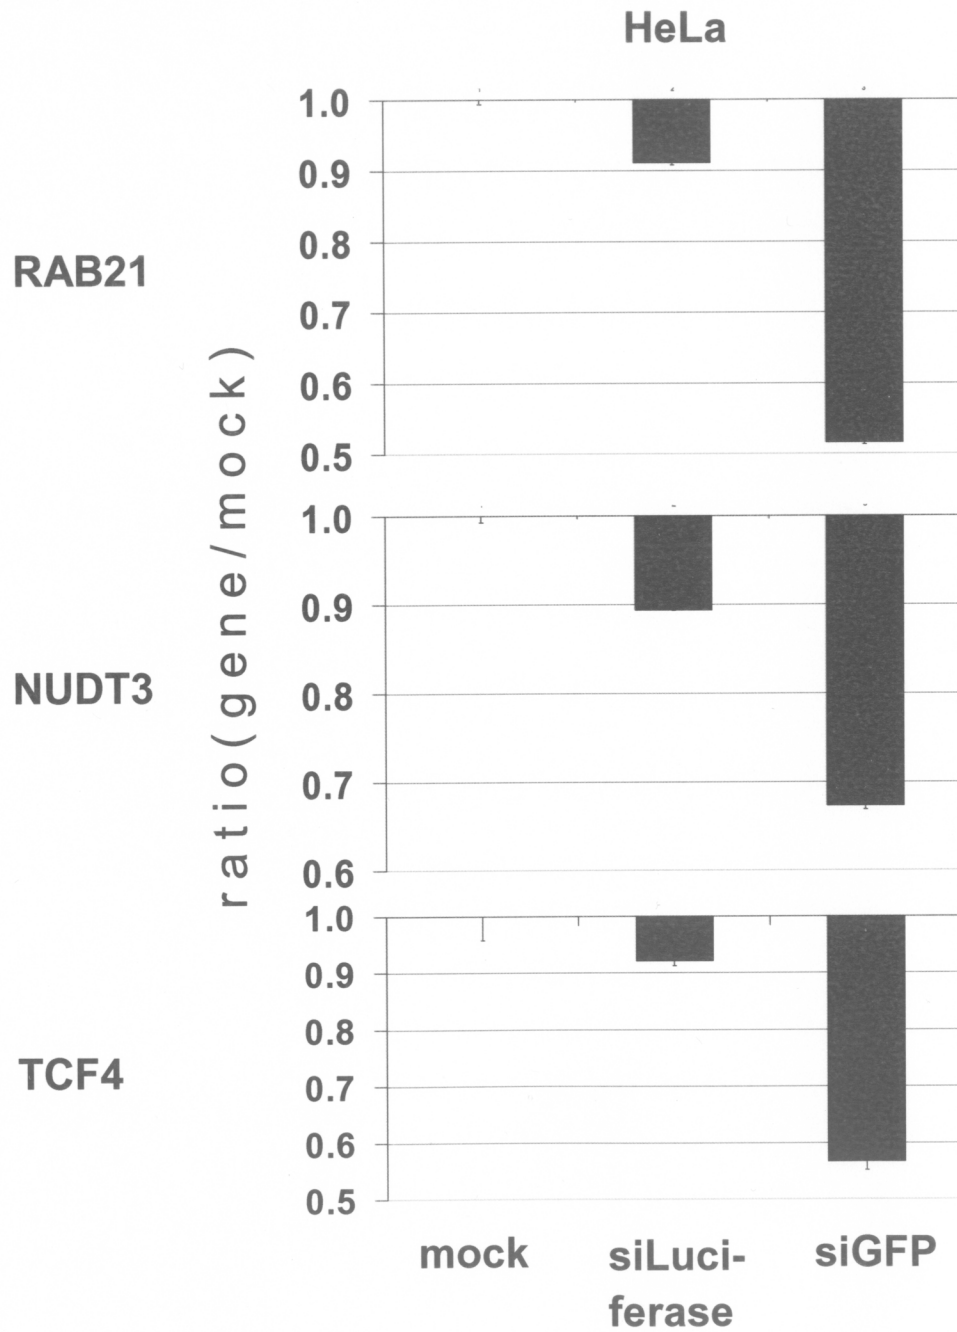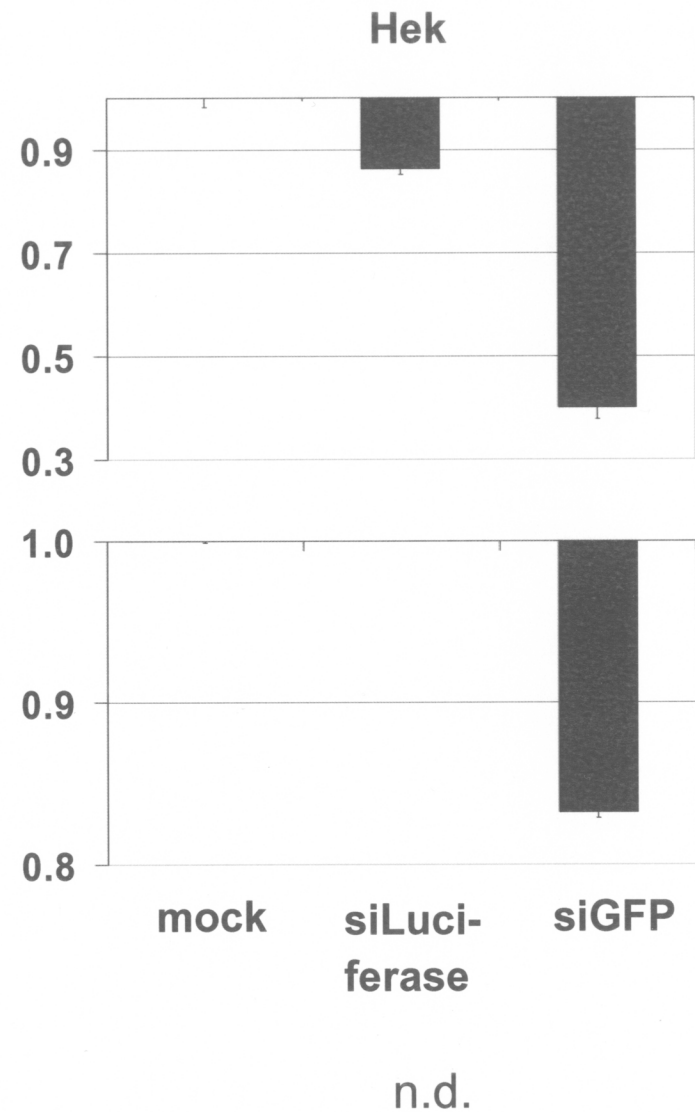

Supplement: 1471-2199-9-60-S1.pdf [file 1471-2199-9-60-S1.pdf]
