# Supplementary material for: Off-target effects of siRNA specific for GFP
Source: PubMed Central journal article supplement (PMC2443166; doi:10.1186/1471-2199-9-60), 2008-06-24
Supplement: 1471-2199-9-60-S2.pdf [file 1471-2199-9-60-S2.pdf]

Additional file 2: Genes deregulated after transfection with GFP siRNA

| upregulated genes |           |                | HELA                                              |      |           | HEK   |      |           |       |
|-------------------|-----------|----------------|---------------------------------------------------|------|-----------|-------|------|-----------|-------|
| #                 | name      | RefSeq         | molecular function                                | M    | adj.P.Val | B     | M    | adj.P.Val | B     |
| 1                 | ANXA3     | NM_005139      | diphosphoinositol-polyposphate diphosphatase      | 2.75 | 1.13E-15  | 37.54 | 0.47 | 3.89E-05  | 9.08  |
| 2                 | LOC51149  | NM_016175      | hypothetical protein                              | 1.29 | 3.48E-11  | 24.46 | 0.29 | 8.79E-03  | 1.61  |
| 3                 | DDAH1     | NM_012137      | hydrolase activity                                | 1.02 | 1.87E-10  | 22.07 | 0.35 | 5.88E-04  | 5.27  |
| 4                 | UBP18     | NM_017414.2    | ubiquitin thiolesterase activity                  | 1.00 | 1.99E-10  | 21.99 | 0.54 | 4.64E-06  | 11.91 |
| 5                 | IL15RA    | NM_002189      | interleukin receptor activity                     | 1.01 | 2.06E-10  | 21.94 | 0.30 | 2.38E-03  | 3.34  |
| 6                 | SPHK1     | NM_021972      | calmodulin binding;transferase activity           | 1.01 | 2.16E-10  | 21.88 | 0.42 | 9.44E-05  | 7.85  |
| 7                 | HIST1H2AC | NM_003512.3    | DNA binding                                       | 1.27 | 2.49E-10  | 21.68 | 0.54 | 7.94E-05  | 8.08  |
| 8                 | MAG1      | NM_032717      | acyltransferase activity                          | 0.95 | 2.70E-10  | 21.53 | 0.40 | 1.21E-04  | 7.53  |
| 9                 | SAT1      | NM_002970      | acyltransferase activity                          | 1.08 | 3.21E-10  | 21.24 | 0.45 | 1.46E-04  | 7.25  |
| 10                | PTGS2     | NM_000963      | peroxidase activity;oxidoreductase activity       | 1.25 | 4.65E-10  | 20.78 | 0.38 | 3.44E-03  | 2.84  |
| 11                | HDHD1A    | NM_012080      | catalytic activity                                | 0.95 | 8.31E-10  | 20.03 | 0.35 | 8.84E-04  | 4.67  |
| 12                | STAMBPL1  | NM_020799      | ubiquitin thiolesterase activity                  | 0.80 | 9.32E-10  | 19.90 | 0.30 | 8.23E-04  | 4.78  |
| 13                | PIGL      | NM_004278      | hydrolase activity                                | 0.83 | 1.17E-09  | 19.61 | 0.36 | 2.10E-04  | 6.73  |
| 14                | CLPB      | NM_030813      | nucleoside-triphosphatase activity                | 0.81 | 2.28E-09  | 18.74 | 0.28 | 3.67E-03  | 2.75  |
| 15                | SMPDL3B   | NM_014474      | hydrolase activity, acting on glycosyl bonds      | 0.88 | 2.40E-09  | 18.67 | 0.33 | 1.45E-03  | 4.02  |
| 16                | HERC6     | NM_017912      | ubiquitin-protein ligase activity;GEF activity    | 0.81 | 2.69E-09  | 18.52 | 0.43 | 5.32E-05  | 8.62  |
| 17                | GLRB      | NM_000824      | inhibitory glycine receptor, CNS                  | 0.79 | 4.31E-09  | 17.90 | 0.28 | 3.47E-03  | 2.82  |
| 18                | HHLA3     | NM_007071      | unknown                                           | 0.73 | 5.02E-09  | 17.71 | 0.36 | 1.86E-04  | 6.89  |
| 19                | GNPDA1    | NM_005471      | hydrolase activity                                | 0.63 | 2.46E-08  | 15.68 | 0.36 | 1.54E-04  | 7.17  |
| 20                | PLEKHA7   | NM_175058      | unknown                                           | 0.63 | 3.29E-08  | 15.32 | 0.28 | 1.97E-03  | 3.59  |
| 21                | RRP9      | NM_004704      | RNA binding                                       | 0.66 | 3.35E-08  | 15.30 | 0.28 | 3.01E-03  | 3.02  |
| 22                | POLR3H    | NM_138338      | protein binding;transferase activity              | 0.70 | 5.10E-08  | 14.79 | 0.34 | 1.41E-03  | 4.05  |
| 23                | PLSCR4    | NM_020353      | calcium ion binding                               | 0.70 | 5.50E-08  | 14.70 | 0.30 | 4.35E-03  | 2.53  |
| 24                | PSEN2     | NM_012486      | protein binding;peptidase activity                | 0.61 | 5.87E-08  | 14.62 | 0.26 | 4.64E-03  | 2.45  |
| 25                | URG4      | NM_017920      | GTP binding                                       | 0.62 | 6.96E-08  | 14.39 | 0.36 | 2.91E-04  | 6.26  |
| 26                | USP18     | NM_017414      | ubiquitin thiolesterase activity                  | 0.80 | 7.32E-08  | 14.32 | 0.56 | 4.38E-05  | 8.92  |
| 27                | LRRC1     | NM_018214      | transferase activity                              | 0.65 | 8.39E-08  | 14.15 | 0.26 | 9.21E-03  | 1.55  |
| 28                | TPBG      | NM_006670      | protein binding                                   | 0.79 | 8.93E-08  | 14.07 | 0.40 | 1.33E-03  | 4.14  |
| 29                | IFIT3     | NM_001549      | binding                                           | 0.84 | 1.07E-07  | 13.84 | 0.46 | 7.07E-04  | 4.99  |
| 30                | LMO7      | NM_005358      | actin binding                                     | 0.59 | 1.07E-07  | 13.83 | 0.38 | 1.50E-04  | 7.21  |
| 31                | ~         | XR_017744.1    | unknown                                           | 0.65 | 1.09E-07  | 13.81 | 0.36 | 5.93E-04  | 5.26  |
| 32                | IFIH1     | NM_022168      | RNA binding;helicase activity                     | 0.64 | 1.82E-07  | 13.16 | 0.28 | 9.11E-03  | 1.56  |
| 33                | SNX10     | NM_013322      | protein binding;phosphoinositide binding          | 0.62 | 2.29E-07  | 12.88 | 0.41 | 1.70E-04  | 7.03  |
| 34                | HIST1H1C  | NM_005319      | DNA binding;protein binding                       | 0.82 | 2.94E-07  | 12.58 | 0.49 | 6.71E-04  | 5.06  |
| 35                | BARD1     | NM_000465      | RNA binding;ubiquitin-protein ligase activity     | 0.52 | 3.84E-07  | 12.25 | 0.24 | 6.93E-03  | 1.92  |
| 36                | VCL       | NM_014000      | structural molecule;oxidoreductase activity       | 0.57 | 3.93E-07  | 12.22 | 0.29 | 3.59E-03  | 2.78  |
| 37                | TRIOBP    | NM_138632      | TRIO and F-actin binding protein                  | 0.53 | 3.99E-07  | 12.20 | 0.25 | 6.42E-03  | 2.01  |
| 38                | ALG6      | NM_013339      | transferase activity                              | 0.54 | 4.71E-07  | 11.99 | 0.39 | 1.28E-04  | 7.45  |
| 39                | FNDC3A    | NM_014923      | unknown                                           | 0.57 | 4.98E-07  | 11.92 | 0.41 | 1.33E-04  | 7.38  |
| 40                | REEP1     | NM_022912      | olfactory receptor binding                        | 0.51 | 6.17E-07  | 11.67 | 0.61 | 5.88E-07  | 14.69 |
| 41                | C17orf68  | NM_025099      | unknown                                           | 0.68 | 6.95E-07  | 11.52 | 0.44 | 5.35E-04  | 5.41  |
| 42                | ABHD3     | NM_138340      | serine esterase activity;hydrolase activity       | 0.53 | 7.48E-07  | 11.43 | 0.32 | 8.79E-04  | 4.68  |
| 43                | NMI       | NM_004688      | transcription cofactor activity;protein binding   | 0.54 | 7.75E-07  | 11.38 | 0.45 | 4.56E-05  | 8.85  |
| 44                | SCRT2     | NM_080725      | antioxidant activity;oxidoreductase activity      | 0.55 | 8.47E-07  | 11.27 | 0.38 | 2.91E-04  | 6.26  |
| 45                | MLL3      | NM_170606      | transferase activity                              | 0.53 | 8.47E-07  | 11.27 | 0.34 | 6.61E-04  | 5.09  |
| 46                | PSMD4     | NM_002810      | protein binding                                   | 0.60 | 8.52E-07  | 11.26 | 0.30 | 6.59E-03  | 1.98  |
| 47                | SEC22A    | NM_012430      | transporter activity                              | 0.51 | 9.77E-07  | 11.09 | 0.29 | 2.40E-03  | 3.32  |
| 48                | DOLK      | NM_014908      | phosphatidate cytidyltransferase activity         | 0.49 | 1.00E-06  | 11.05 | 0.24 | 7.98E-03  | 1.73  |
| 49                | MYL6      | NM_021019      | actin-dependent ATPase activity                   | 0.59 | 1.12E-06  | 10.91 | 0.32 | 4.02E-03  | 2.63  |
| 50                | ANXA1     | NM_000700      | phospholipase inhibitor activity;receptor binding | 0.53 | 1.33E-06  | 10.71 | 0.35 | 6.92E-04  | 5.02  |
| 51                | RIBC2     | NM_015653      | unknown                                           | 0.48 | 1.47E-06  | 10.58 | 0.35 | 3.16E-04  | 6.13  |
| 52                | LGALS3BP  | NM_005567      | scavenger receptor activity;protein binding       | 0.47 | 1.48E-06  | 10.58 | 0.24 | 8.11E-03  | 1.71  |
| 53                | TNR6C     | NM_018996.2    | nucleotide binding                                | 0.52 | 1.56E-06  | 10.51 | 0.26 | 8.93E-03  | 1.59  |
| 54                | TFRC      | NM_003234      | receptor activity;transferrin receptor activity   | 0.49 | 1.60E-06  | 10.48 | 0.36 | 3.42E-04  | 6.01  |
| 55                | THAS      | NM_001061.2    | electron transport                                | 0.62 | 1.64E-06  | 10.45 | 0.32 | 8.90E-03  | 1.59  |
| 56                | MCOLN3    | NM_018298      | ion channel activity                              | 0.52 | 1.70E-06  | 10.40 | 0.35 | 8.29E-04  | 4.76  |
| 57                | CBR4      | NM_032783      | oxidoreductase activity                           | 0.51 | 1.71E-06  | 10.40 | 0.32 | 1.54E-03  | 3.94  |
| 58                | TESC      | NM_017899      | calcium ion binding                               | 0.56 | 1.76E-06  | 10.35 | 0.50 | 4.52E-05  | 8.87  |
| 59                | FBN1      | NM_000138      | extracellular matrix structural constituent       | 0.62 | 1.76E-06  | 10.36 | 0.31 | 1.04E-02  | 1.40  |
| 60                | CASP7     | NM_001227      | cysteine-type peptidase activity;caspase activity | 0.52 | 1.86E-06  | 10.29 | 0.40 | 1.76E-04  | 6.96  |
| 61                | MAPKAPK3  | NM_004635      | protein serine/threonine kinase activity          | 0.52 | 2.14E-06  | 10.11 | 0.40 | 2.64E-04  | 6.41  |
| 62                | CRY1      | NM_004075      | G-protein coupled photoreceptor activity          | 0.56 | 2.30E-06  | 10.02 | 0.44 | 1.81E-04  | 6.92  |
| 63                | GBA       | NM_000157      | hydrolase activity                                | 0.58 | 2.31E-06  | 10.01 | 0.30 | 1.04E-02  | 1.40  |
| 64                | HN1       | NM_001002032   | unknown                                           | 0.56 | 2.41E-06  | 9.95  | 0.49 | 6.49E-05  | 8.37  |
| 65                | LIMA1     | NM_016357      | actin monomer binding;actin filament binding      | 0.54 | 2.62E-06  | 9.85  | 0.33 | 2.48E-03  | 3.28  |
| 66                | C13orf27  | NM_138779      | unknown                                           | 0.59 | 3.03E-06  | 9.66  | 0.36 | 2.75E-03  | 3.14  |
| 67                | HSD17B6   | NM_003725      | oxidoreductase activity                           | 0.50 | 3.63E-06  | 9.43  | 0.38 | 3.50E-04  | 5.97  |
| 68                | SLC44A3   | NM_152369      | unknown                                           | 0.54 | 3.64E-06  | 9.43  | 0.51 | 4.12E-05  | 9.01  |
| 69                | SERPINI1  | NM_005025      | serine-type endopeptidase inhibitor activity      | 0.47 | 3.89E-06  | 9.35  | 0.46 | 3.75E-05  | 9.13  |
| 70                | LOC497661 | NM_001035005.2 | unknown                                           | 0.53 | 4.19E-06  | 9.25  | 0.42 | 3.10E-04  | 6.16  |

|     |          |                |                                                   |      |          |      |      |          |       |
|-----|----------|----------------|---------------------------------------------------|------|----------|------|------|----------|-------|
| 71  | DUS2L    | NM_017803      | double-stranded RNA binding                       | 0.49 | 4.20E-06 | 9.25 | 0.32 | 1.85E-03 | 3.69  |
| 72  | TXNRD1   | NM_182743      | oxidoreductase activity                           | 0.46 | 4.58E-06 | 9.14 | 0.30 | 2.13E-03 | 3.48  |
| 73  | TRXR     | NM_182742      | signal transduction                               | 0.46 | 4.58E-06 | 9.14 | 0.30 | 2.13E-03 | 3.48  |
| 74  | TPD52L1  | NM_003287      | protein dimerization activity                     | 0.48 | 6.54E-06 | 8.69 | 0.28 | 8.47E-03 | 1.66  |
| 75  | REEP3    | NM_001001330.1 | integral to membrane                              | 0.52 | 7.13E-06 | 8.59 | 0.34 | 3.37E-03 | 2.86  |
| 76  | PIP5K2C  | NM_024779      | kinase activity;transferase activity              | 0.46 | 7.26E-06 | 8.57 | 0.37 | 4.36E-04 | 5.68  |
| 77  | EWS      | NM_005243.2    | regulation of transcription                       | 0.45 | 7.54E-06 | 8.52 | 0.27 | 6.46E-03 | 2.01  |
| 78  | EFEMP1   | NM_004105      | calcium ion binding;protein binding               | 0.48 | 8.44E-06 | 8.38 | 0.32 | 2.48E-03 | 3.28  |
| 79  | FBLN3    | NM_004105      | unknown                                           | 0.48 | 8.44E-06 | 8.38 | 0.32 | 2.48E-03 | 3.28  |
| 80  | FZD3     | NM_017412      | G-protein coupled receptor activity               | 0.42 | 9.55E-06 | 8.23 | 0.32 | 7.81E-04 | 4.84  |
| 81  | TRIM45   | NM_025188      | protein binding;zinc ion binding                  | 0.44 | 9.67E-06 | 8.22 | 0.38 | 2.87E-04 | 6.30  |
| 82  | FLJ38973 | NM_153689      | hypothetical protein                              | 0.47 | 9.91E-06 | 8.19 | 0.45 | 7.15E-05 | 8.23  |
| 83  | TFPI     | NM_006287      | serine-type endopeptidase inhibitor activity      | 0.51 | 1.01E-05 | 8.16 | 0.35 | 1.96E-03 | 3.59  |
| 84  | MAPE     | NM_006115.3    | unknown                                           | 0.45 | 1.03E-05 | 8.13 | 0.45 | 5.15E-05 | 8.67  |
| 85  | HOXA1    | NM_005522      | RNA polymerase II transcription factor activity   | 0.43 | 1.04E-05 | 8.13 | 0.44 | 4.57E-05 | 8.84  |
| 86  | ARSJ     | NM_024590      | hydrolase activity                                | 0.44 | 1.06E-05 | 8.10 | 0.37 | 3.42E-04 | 6.00  |
| 87  | SLC16A10 | NM_018593      | transporter activity                              | 0.46 | 1.29E-05 | 7.87 | 0.30 | 5.04E-03 | 2.33  |
| 88  | FBXO4    | NM_012176      | ubiquitin-protein ligase activity;protein binding | 0.44 | 1.30E-05 | 7.87 | 0.29 | 3.19E-03 | 2.94  |
| 89  | MAFB     | NM_005461      | DNA binding;transcription factor activity         | 0.40 | 1.34E-05 | 7.83 | 0.35 | 3.15E-04 | 6.14  |
| 90  | NIT1     | NM_005600      | hydrolase activity                                | 0.43 | 1.47E-05 | 7.71 | 0.31 | 1.74E-03 | 3.77  |
| 91  | NRG4     | NM_138573      | growth factor activity                            | 0.40 | 1.55E-05 | 7.65 | 0.35 | 2.90E-04 | 6.27  |
| 92  | MARS     | NM_004990      | methionine-tRNA ligase activity                   | 0.47 | 1.61E-05 | 7.60 | 0.42 | 3.14E-04 | 6.14  |
| 93  | ZMYM6    | NM_007167.3    | protein binding                                   | 0.44 | 1.72E-05 | 7.52 | 0.28 | 7.23E-03 | 1.86  |
| 94  | ELOVL1   | NM_022821      | protein binding                                   | 0.43 | 1.76E-05 | 7.48 | 0.65 | 9.37E-07 | 14.02 |
| 95  | SLC1A3   | NM_004172      | L-glutamate transporter activity                  | 0.45 | 1.80E-05 | 7.46 | 0.46 | 7.45E-05 | 8.16  |
| 96  | KIAA0746 | NM_015187      | binding                                           | 0.48 | 1.95E-05 | 7.36 | 0.39 | 7.81E-04 | 4.85  |
| 97  | B4GALT6  | NM_004775      | transferase activity                              | 0.39 | 2.15E-05 | 7.24 | 0.36 | 2.31E-04 | 6.59  |
| 98  | TIPARP   | NM_015508      | protein binding;transferase activity              | 0.45 | 2.38E-05 | 7.12 | 0.29 | 6.59E-03 | 1.98  |
| 99  | Q86VR7   | XM_085831      | unknown                                           | 0.44 | 2.38E-05 | 7.12 | 0.33 | 1.95E-03 | 3.61  |
| 100 | HSPA4L   | NM_014278      | nucleotide binding;protein binding;ATP binding    | 0.40 | 2.66E-05 | 6.99 | 0.25 | 8.78E-03 | 1.61  |
| 101 | NSF      | NM_006178      | ATP binding;hydrolase activity                    | 0.43 | 2.67E-05 | 6.98 | 0.44 | 9.72E-05 | 7.81  |
| 102 | ZDHHC23  | NM_173570      | acyltransferase activity                          | 0.45 | 2.70E-05 | 6.97 | 0.62 | 3.63E-06 | 12.22 |
| 103 | STAR9    | XM_001129290.1 | unknown                                           | 0.37 | 3.51E-05 | 6.66 | 0.24 | 9.94E-03 | 1.45  |
| 104 | FGG      | NM_021870      | receptor binding;calcium ion binding              | 0.42 | 3.89E-05 | 6.53 | 0.29 | 5.62E-03 | 2.18  |
| 105 | GLMN     | NM_053274      | hepatocyte growth factor receptor binding         | 0.36 | 4.14E-05 | 6.46 | 0.42 | 3.75E-05 | 9.13  |
| 106 | CREBL2   | NM_001310      | transcription factor activity                     | 0.38 | 4.28E-05 | 6.41 | 0.30 | 1.83E-03 | 3.70  |
| 107 | CCNC     | NM_005190      | transcriptional regulation                        | 0.50 | 4.36E-05 | 6.39 | 0.35 | 5.37E-03 | 2.25  |
| 108 | DNAJC5   | NM_025219.1    | protein folding                                   | 0.41 | 4.58E-05 | 6.33 | 0.35 | 9.72E-04 | 4.55  |
| 109 | STX12    | NM_177424      | protein transporter activity                      | 0.40 | 5.00E-05 | 6.23 | 0.33 | 1.38E-03 | 4.09  |
| 110 | TMEM55A  | NM_018710      | hydrolase activity                                | 0.44 | 5.10E-05 | 6.20 | 0.31 | 5.38E-03 | 2.25  |
| 111 | PLAGL2   | NM_002657      | transcription factor activity;zinc ion binding    | 0.37 | 5.14E-05 | 6.19 | 0.34 | 4.94E-04 | 5.51  |
| 112 | PIGY     | NM_032906      | protein binding                                   | 0.38 | 5.70E-05 | 6.12 | 0.36 | 2.12E-03 | 3.65  |
| 113 | CHAC2    | NM_001008708   | cation transport activity                         | 0.36 | 6.07E-05 | 5.98 | 0.45 | 2.46E-05 | 9.72  |
| 114 | SNX11    | NM_152244      | protein binding;phosphoinositide binding          | 0.39 | 6.40E-05 | 5.92 | 0.29 | 4.92E-03 | 2.37  |
| 115 | ACTR5    | NM_024855      | protein binding;ATP binding                       | 0.40 | 8.14E-05 | 5.63 | 0.45 | 9.91E-05 | 7.78  |
| 116 | NSMAF    | NM_003580      | receptor signaling protein activity               | 0.37 | 8.43E-05 | 5.59 | 0.32 | 1.35E-03 | 4.12  |
| 117 | TMEM9B   | NM_020644      | signal transducer activity                        | 0.37 | 8.52E-05 | 5.58 | 0.37 | 3.93E-04 | 5.82  |
| 118 | INPP5A   | NM_005539      | phosphatidylinositol phosphatase activity         | 0.40 | 8.55E-05 | 5.57 | 0.36 | 9.46E-04 | 4.59  |
| 119 | PDCD10   | NM_007217      | protein binding                                   | 0.43 | 9.57E-05 | 5.44 | 0.41 | 5.37E-04 | 5.40  |
| 120 | GNB5     | NM_016194      | GTPase activity;signal transducer activity        | 0.35 | 1.13E-04 | 5.25 | 0.25 | 9.11E-03 | 1.56  |
| 121 | CR2      | NM_001877      | complement receptor activity                      | 0.37 | 1.19E-04 | 5.18 | 0.45 | 5.43E-05 | 8.60  |
| 122 | SLIT2    | NM_004787      | follicle-stimulating hormone receptor activity    | 0.36 | 1.30E-04 | 5.09 | 0.27 | 6.59E-03 | 1.98  |
| 123 | SS18L2   | NM_016305      | unknown                                           | 0.35 | 1.44E-04 | 4.96 | 0.25 | 9.10E-03 | 1.56  |
| 124 | C19orf63 | NM_175063      | unknown                                           | 0.36 | 1.55E-04 | 4.87 | 0.43 | 8.41E-05 | 7.99  |
| 125 | ABCF2    | NM_007189      | transporter activity;ATPase activity              | 0.38 | 1.61E-04 | 4.82 | 0.32 | 2.28E-03 | 3.39  |
| 126 | PHLPPL   | NM_015020      | phosphoprotein phosphatase activity               | 0.33 | 1.86E-04 | 4.65 | 0.28 | 3.10E-03 | 2.98  |
| 127 | GPR160   | NM_014373      | rhodopsin-like receptor activity                  | 0.34 | 1.95E-04 | 4.59 | 0.35 | 5.75E-04 | 5.30  |
| 128 | SLC27A2  | NM_003645      | long-chain-fatty-acid-CoA ligase activity         | 0.37 | 2.04E-04 | 4.54 | 0.40 | 2.89E-04 | 6.28  |
| 129 | LYRM5    | NM_001001660   | unknown                                           | 0.35 | 2.08E-04 | 4.52 | 0.34 | 8.16E-04 | 4.79  |
| 130 | GCN1L1   | NM_006836      | translation factor activity                       | 0.41 | 2.19E-04 | 4.46 | 0.32 | 6.30E-03 | 2.04  |
| 131 | PKIA     | NM_006823      | cAMP-dependent protein kinase inhibitor activity  | 0.38 | 2.26E-04 | 4.42 | 0.41 | 4.07E-04 | 5.78  |
| 132 | PFN2     | NM_053024      | actin binding;protein binding                     | 0.36 | 2.28E-04 | 4.41 | 0.54 | 1.34E-05 | 10.54 |
| 133 | PSMC3    | NM_002804      | transcription regulation activity                 | 0.37 | 2.37E-04 | 4.36 | 0.30 | 5.91E-03 | 2.12  |
| 134 | MOSC2    | NM_017898      | oxidoreductase activity                           | 0.36 | 2.46E-04 | 4.31 | 0.32 | 2.12E-03 | 3.49  |
| 135 | LIMCH1   | NM_014988      | actin binding;zinc ion binding                    | 0.36 | 2.70E-04 | 4.20 | 0.31 | 3.78E-03 | 2.71  |
| 136 | OAS3     | NM_006187      | RNA binding;ATP binding;transferase activity      | 0.40 | 2.82E-04 | 4.15 | 0.80 | 5.77E-07 | 14.75 |
| 137 | PLS1     | NM_002670.1    | actin binding                                     | 0.39 | 2.94E-04 | 4.10 | 0.48 | 1.34E-04 | 7.37  |
| 138 | SLC35A5  | NM_017945      | nucleotide-sugar transporter activity             | 0.32 | 3.26E-04 | 3.98 | 0.38 | 2.19E-04 | 6.67  |
| 139 | MPHOSPH6 | NM_005792      | protein binding                                   | 0.38 | 3.35E-04 | 3.94 | 0.40 | 6.49E-04 | 5.12  |
| 140 | PARP4    | NM_006437      | NAD+ ADP-ribosyltransferase activity              | 0.35 | 3.69E-04 | 3.83 | 0.33 | 2.08E-03 | 3.51  |
| 141 | ZWINT    | NM_007057.3    | mitotic check point                               | 0.30 | 3.75E-04 | 3.81 | 0.53 | 3.21E-06 | 12.40 |
| 142 | SDC2     | NM_002998      | molecular_function;cytoskeletal protein binding   | 0.35 | 3.86E-04 | 3.78 | 0.35 | 1.31E-03 | 4.16  |
| 143 | VPS16    | NM_002836      | receptor activity                                 | 0.34 | 3.87E-04 | 3.78 | 0.27 | 8.40E-03 | 1.66  |

|     |          |             |                                                      |      |          |      |      |          |       |
|-----|----------|-------------|------------------------------------------------------|------|----------|------|------|----------|-------|
| 144 | PTPRA    | NM_002836   | receptor activity                                    | 0.34 | 3.87E-04 | 3.78 | 0.27 | 8.40E-03 | 1.66  |
| 145 | ARL2BP   | NM_012106   | small GTPase regulator activity                      | 0.34 | 4.49E-04 | 3.59 | 0.41 | 2.74E-04 | 6.36  |
| 146 | NUB1     | NM_016118   | molecular_function                                   | 0.30 | 5.45E-04 | 3.37 | 0.38 | 1.48E-04 | 7.22  |
| 147 | PTER     | NM_030664   | zinc ion binding;hydrolase activity                  | 0.30 | 5.48E-04 | 3.36 | 0.24 | 9.37E-03 | 1.52  |
| 148 | PLEKHH2  | NM_172069   | binding                                              | 0.41 | 5.56E-04 | 3.34 | 0.36 | 5.54E-03 | 2.21  |
| 149 | PISD     | NM_014338   | phosphatidylserine decarboxylase activity            | 0.31 | 5.77E-04 | 3.30 | 0.48 | 1.96E-05 | 10.06 |
| 150 | EML4     | NM_019063   | molecular_function;protein binding                   | 0.35 | 5.77E-04 | 3.30 | 0.47 | 1.09E-04 | 7.66  |
| 151 | RABGAP1  | NM_012197   | tubulin binding;regulation of Rab GTPase activity    | 0.30 | 5.90E-04 | 3.27 | 0.31 | 1.47E-03 | 4.00  |
| 152 | SPINT2   | NM_021102   | serine-type endopeptidase inhibitor activity         | 0.34 | 5.95E-04 | 3.26 | 0.28 | 9.43E-03 | 1.52  |
| 153 | SLC20A1  | NM_005415   | receptor activity                                    | 0.39 | 6.61E-04 | 3.13 | 0.39 | 1.98E-03 | 3.58  |
| 154 | SCOC     | NM_032547   | unknown                                              | 0.33 | 7.28E-04 | 3.02 | 0.37 | 7.51E-04 | 4.91  |
| 155 | CD59     | NM_203331   | protein binding;GPI anchor binding                   | 0.34 | 7.34E-04 | 3.01 | 0.30 | 6.13E-03 | 2.07  |
| 156 | RTN4IP1  | NM_032730   | zinc ion binding;oxidoreductase activity             | 0.30 | 7.72E-04 | 2.95 | 0.46 | 3.15E-05 | 9.36  |
| 157 | HIP2     | NM_005339   | ubiquitin-protein ligase activity                    | 0.33 | 7.81E-04 | 2.94 | 0.31 | 3.57E-03 | 2.79  |
| 158 | C3orf59  | NM_178496.2 | unknown                                              | 0.31 | 7.87E-04 | 2.93 | 0.37 | 3.16E-04 | 6.12  |
| 159 | C1orf56  | NM_006818   | unknown                                              | 0.29 | 8.11E-04 | 2.89 | 0.27 | 5.42E-03 | 2.23  |
| 160 | MLLT11   | NM_006818   | unknown                                              | 0.29 | 8.11E-04 | 2.89 | 0.27 | 5.42E-03 | 2.23  |
| 161 | HLA-DRB5 | NM_002125   | antigen presentation via MHC class II                | 0.28 | 8.69E-04 | 2.81 | 0.28 | 2.92E-03 | 3.06  |
| 162 | STK11IP  | NM_052902   | protein binding;kinase activity                      | 0.28 | 8.76E-04 | 2.80 | 0.27 | 3.54E-03 | 2.80  |
| 163 | GRAMD1C  | NM_017577.3 | unknown                                              | 0.34 | 8.94E-04 | 2.77 | 0.46 | 1.72E-04 | 7.01  |
| 164 | CKLF     | NM_016951   | chemokine activity                                   | 0.30 | 9.13E-04 | 2.75 | 0.28 | 4.88E-03 | 2.38  |
| 165 | PCOLCE2  | NM_013363   | heparin binding                                      | 0.32 | 9.16E-04 | 2.75 | 0.37 | 6.64E-04 | 5.08  |
| 166 | SLC25A12 | NM_003705   | L-glutamate transporter activity                     | 0.31 | 9.81E-04 | 2.67 | 0.28 | 5.96E-03 | 2.11  |
| 167 | COIL     | NM_004645   | protein binding                                      | 0.30 | 9.82E-04 | 2.66 | 0.27 | 5.55E-03 | 2.20  |
| 168 | PIK3CB   | NM_006219   | insulin receptor substrate binding;kinase activity   | 0.30 | 1.00E-03 | 2.64 | 0.27 | 7.22E-03 | 1.87  |
| 169 | PKIB     | NM_181795   | cAMP-dependent protein kinase inhibitor activity     | 0.29 | 1.03E-03 | 2.61 | 0.42 | 6.72E-05 | 8.32  |
| 170 | SLC41A1  | NM_173854   | cation transporter activity                          | 0.30 | 1.03E-03 | 2.60 | 0.41 | 1.67E-04 | 7.06  |
| 171 | DMD      | NM_000109   | actin binding;structural constituent of cytoskeleton | 0.27 | 1.06E-03 | 2.57 | 0.37 | 1.71E-04 | 7.02  |
| 172 | CD58     | NM_001779   | protein binding;GPI anchor binding                   | 0.28 | 1.17E-03 | 2.46 | 0.26 | 6.80E-03 | 1.94  |
| 173 | PRPSAP2  | NM_002767   | enzyme inhibitor activity                            | 0.30 | 1.22E-03 | 2.41 | 0.27 | 1.00E-02 | 1.44  |
| 174 | PSMC5    | NM_002805   | transcription cofactor activity                      | 0.29 | 1.26E-03 | 2.37 | 0.33 | 1.16E-03 | 4.32  |
| 175 | ATP5L    | NM_006476   | hydrogen ion transporting ATPase activity            | 0.27 | 1.31E-03 | 2.32 | 0.34 | 4.26E-04 | 5.72  |
| 176 | CEP72    | NM_018140   | protein binding                                      | 0.33 | 1.34E-03 | 2.30 | 0.29 | 1.03E-02 | 1.40  |
| 177 | FMO5     | NM_001461   | monooxygenase activity;FAD binding                   | 0.28 | 1.34E-03 | 2.30 | 0.27 | 4.69E-03 | 2.43  |
| 178 | TFDP1    | NM_007111   | transcription factor activity                        | 0.31 | 1.41E-03 | 2.24 | 0.52 | 2.37E-05 | 9.81  |
| 179 | GTF2A2   | NM_004492   | RNA polymerase II transcription factor activity      | 0.27 | 1.43E-03 | 2.22 | 0.30 | 1.49E-03 | 3.98  |
| 180 | ARHGEF4  | NM_015320   | Rho guanyl-nucleotide exchange factor activity       | 0.29 | 1.46E-03 | 2.20 | 0.33 | 1.10E-03 | 4.38  |
| 181 | EBNA1BP2 | NM_006824   | protein binding                                      | 0.31 | 1.57E-03 | 2.11 | 0.41 | 2.64E-04 | 6.40  |
| 182 | MTMR9    | NM_015458   | phosphatidylinositol phosphatase activity            | 0.33 | 1.67E-03 | 2.04 | 0.33 | 5.12E-03 | 2.31  |
| 183 | FARS2    | NM_006567   | phenylalanine-tRNA ligase activity                   | 0.33 | 1.92E-03 | 1.87 | 0.34 | 3.16E-03 | 2.95  |
| 184 | SYNE1    | NM_182961   | actin binding;structural molecule activity           | 0.29 | 2.00E-03 | 1.82 | 0.27 | 7.78E-03 | 1.76  |
| 185 | CTSC     | NM_148170   | cysteine-type peptidase activity                     | 0.27 | 2.12E-03 | 1.76 | 0.44 | 4.99E-05 | 8.71  |
| 186 | DYNC1L1  | NM_016141   | nucleotide binding;motor activity;ATP binding        | 0.27 | 2.13E-03 | 1.75 | 0.27 | 5.57E-03 | 2.20  |
| 187 | HEL308   | NM_133636   | ATP-dependent helicase activity                      | 0.26 | 2.26E-03 | 1.68 | 0.29 | 1.73E-03 | 3.77  |
| 188 | IGFBP7   | NM_001553   | insulin-like growth factor binding                   | 0.27 | 2.47E-03 | 1.57 | 0.31 | 1.53E-03 | 3.94  |
| 189 | ALS2     | NM_020919   | guanyl-nucleotide exchange factor activity           | 0.27 | 2.57E-03 | 1.53 | 0.26 | 7.57E-03 | 1.80  |
| 190 | FAM49B   | NM_016623   | unknown                                              | 0.27 | 2.82E-03 | 1.42 | 0.26 | 9.03E-03 | 1.57  |

Additional file 2: Genes deregulated after transfection with GFP siRNA

| downregulated genes |           |                 | HELA                                            |       |           | HEK   |       |           |       |
|---------------------|-----------|-----------------|-------------------------------------------------|-------|-----------|-------|-------|-----------|-------|
| #                   | name      | RefSeq/Ensembl  | molecular function                              | M     | adj.P.Val | B     | M     | adj.P.Val | B     |
| 1                   | SOAT1     | NM_003101       | sterol O-acyltransferase activity               | -2.28 | 8.72E-14  | 32.76 | -0.83 | 8.18E-07  | 14.15 |
| 2                   | Q96HQ8    | ENSG00000173215 | unknown                                         | -1.95 | 8.72E-14  | 32.87 | -1.52 | 7.71E-12  | 27.43 |
| 3                   | CASP8     | NM_033356       | signal transducer activity;caspase activity     | -1.56 | 5.35E-13  | 30.32 | -0.88 | 6.42E-09  | 20.37 |
| 4                   | C10orf56  | NM_153367       | nucleic acid binding;zinc ion binding           | -1.62 | 6.03E-13  | 30.12 | -0.49 | 1.35E-05  | 10.51 |
| 5                   | NUDT3     | NM_006703       | magnesium ion binding;hydrolase activity        | -1.45 | 1.74E-12  | 28.78 | -0.42 | 6.64E-05  | 8.35  |
| 6                   | RAB21     | NM_014999       | nucleotide binding;GTP binding                  | -1.55 | 1.89E-12  | 28.60 | -0.76 | 1.51E-07  | 16.52 |
| 7                   | HMGCS1    | NM_002130       | hydroxymethylglutaryl-CoA synthase activity     | -1.48 | 2.73E-12  | 28.09 | -0.45 | 6.05E-05  | 8.47  |
| 8                   | PAICS     | NM_006452       | catalytic activity;ATP binding                  | -1.37 | 3.72E-12  | 27.62 | -0.66 | 3.61E-07  | 15.39 |
| 9                   | TM16F     | NM_001025356.1  | integral to membrane                            | -1.59 | 4.96E-12  | 27.25 | -0.45 | 2.18E-04  | 6.68  |
| 10                  | GOSR1     | NM_004871       | v-SNARE activity                                | -1.47 | 5.13E-12  | 27.13 | -0.46 | 6.89E-05  | 8.29  |
| 11                  | PSF1      | NM_021067.3     | protein binding                                 | -2.18 | 5.44E-12  | 27.01 | -1.55 | 5.47E-09  | 20.81 |
| 12                  | CYLD      | NM_015247       | NFkB pathway                                    | -1.39 | 6.75E-12  | 26.74 | -0.60 | 2.91E-06  | 12.56 |
| 13                  | CXorf34   | NM_024917       | methyltransferase activity                      | -1.68 | 1.11E-11  | 26.08 | -0.67 | 1.08E-05  | 10.82 |
| 14                  | SKP2      | NM_005983       | protein binding                                 | -1.18 | 1.80E-11  | 25.33 | -0.74 | 7.49E-08  | 17.28 |
| 15                  | IL6ST     | NM_002184       | interleukin-6 receptor activity;protein binding | -1.20 | 2.92E-11  | 24.72 | -0.57 | 3.49E-06  | 12.27 |
| 16                  | C10orf119 | NM_024834       | hypothetical protein                            | -1.14 | 3.13E-11  | 24.63 | -0.26 | 5.18E-03  | 2.29  |
| 17                  | LARS2     | NM_015340       | leucine-tRNA ligase activity;ATP binding        | -1.18 | 5.29E-11  | 23.85 | -0.49 | 2.65E-05  | 9.59  |
| 18                  | NR1D2     | NM_005126       | transcription factor activity                   | -1.12 | 5.63E-11  | 23.71 | -0.32 | 1.36E-03  | 4.11  |
| 19                  | ACSL4     | NM_022977       | long-chain-fatty-acid-CoA ligase activity       | -1.22 | 6.44E-11  | 23.51 | -0.47 | 7.21E-05  | 8.21  |
| 20                  | CCD25     | NP_060716       | unknown                                         | -1.09 | 1.72E-10  | 22.18 | -0.33 | 1.67E-03  | 3.83  |
| 21                  | RPIA      | NM_144563       | ribose-5-phosphate isomerase activity           | -1.25 | 2.70E-10  | 21.55 | -0.36 | 4.29E-03  | 2.55  |
| 22                  | ST3GAL4   | NM_006278       | ST3 beta-galactoside sialyltransferase 4        | -0.88 | 2.70E-10  | 21.49 | -0.29 | 1.31E-03  | 4.16  |
| 23                  | Q8NDF8-3  | NM_001040284    | unknown                                         | -0.88 | 2.92E-10  | 21.37 | -0.37 | 1.30E-04  | 7.41  |
| 24                  | TCF4      | NM_003199       | transcription factor activity                   | -1.00 | 3.51E-10  | 21.12 | -0.38 | 3.16E-04  | 6.12  |
| 25                  | UNC5B     | NM_170744       | signal transduction                             | -1.01 | 4.59E-10  | 20.80 | -0.33 | 1.95E-03  | 3.61  |
| 26                  | MMP2      | NM_004530       | protein binding, metal ion binding              | -0.99 | 5.87E-10  | 20.49 | -0.27 | 9.65E-03  | 1.48  |
| 27                  | ETS2      | NM_005239       | transcription factor activity                   | -0.82 | 9.78E-10  | 19.83 | -0.38 | 9.55E-05  | 7.84  |
| 28                  | YTHDF1    | NM_017798       | unknown                                         | -0.80 | 1.03E-09  | 19.76 | -0.58 | 7.44E-07  | 14.38 |
| 29                  | HPRT1     | NM_000194       | hypoxanthine phosphoribosyltransferase          | -0.99 | 1.58E-09  | 19.23 | -1.58 | 3.06E-11  | 26.02 |
| 30                  | HP1BP3    | NM_016287       | DNA binding                                     | -0.78 | 2.89E-09  | 18.43 | -0.40 | 9.62E-05  | 7.82  |
| 31                  | ZFAND6    | NM_019006       | DNA binding;zinc ion binding                    | -0.97 | 3.18E-09  | 18.31 | -0.33 | 4.55E-03  | 2.47  |
| 32                  | RAB4A     | NM_004578       | GTPase activity                                 | -0.94 | 3.23E-09  | 18.28 | -0.30 | 8.50E-03  | 1.65  |
| 33                  | MAPK9     | NM_002752       | protein serine/threonine kinase activity        | -0.89 | 4.63E-09  | 17.82 | -0.59 | 7.67E-06  | 11.24 |
| 34                  | CYFIP1    | NM_014608       | Rac GTPase binding;actin filament binding       | -0.75 | 5.30E-09  | 17.63 | -0.51 | 6.86E-06  | 11.36 |
| 35                  | ZNF503    | NM_032772       | nucleic acid binding;zinc ion binding           | -1.06 | 6.64E-09  | 17.35 | -0.56 | 1.29E-04  | 7.43  |
| 36                  | ~         | ENSG00000187025 | unknown                                         | -1.08 | 6.78E-09  | 17.33 | -0.39 | 4.92E-03  | 2.37  |
| 37                  | SUHW3     | NM_017666       | DNA binding;zinc ion binding                    | -0.80 | 7.21E-09  | 17.24 | -0.28 | 5.66E-03  | 2.18  |
| 38                  | GAL       | NM_015973       | neuropeptide hormone activity                   | -1.29 | 1.04E-08  | 16.76 | -0.71 | 1.11E-04  | 7.64  |
| 39                  | EEF1A2    | NM_001958       | translation elongation factor activity          | -0.69 | 1.91E-08  | 16.01 | -0.33 | 6.60E-04  | 5.10  |
| 40                  | ERRF1     | NM_018948       | Rho GTPase activator activity                   | -0.73 | 2.28E-08  | 15.78 | -0.32 | 1.70E-03  | 3.80  |
| 41                  | OAZ1      | NM_004152       | ornithine decarboxylase inhibitor activity      | -0.75 | 2.32E-08  | 15.76 | -0.40 | 2.92E-04  | 6.26  |
| 42                  | ALS2CR13  | NM_173511       | unknown                                         | -0.68 | 2.37E-08  | 15.73 | -0.30 | 1.79E-03  | 3.74  |
| 43                  | THBS2     | NM_003247       | structural molecule activity                    | -0.76 | 2.97E-08  | 15.44 | -0.28 | 8.87E-03  | 1.60  |
| 44                  | C5orf5    | NM_016603       | GTPase activator activity                       | -0.68 | 3.04E-08  | 15.41 | -0.33 | 1.03E-03  | 4.48  |
| 45                  | FLJ31818  | NM_152556       | unknown                                         | -0.68 | 3.27E-08  | 15.33 | -0.27 | 5.38E-03  | 2.24  |
| 46                  | ~         | ENSG00000180632 | unknown                                         | -0.81 | 5.10E-08  | 14.79 | -0.71 | 2.12E-06  | 12.90 |
| 47                  | LOC146909 | NP_001073912    | ATP binding                                     | -0.66 | 5.40E-08  | 14.72 | -0.95 | 5.47E-09  | 20.75 |
| 48                  | Q8N2D2    | ENST00000356486 | unknown                                         | -0.65 | 6.12E-08  | 14.57 | -0.33 | 1.01E-03  | 4.50  |
| 49                  | TRAK2     | NM_015049       | intracellular transporter activity              | -0.63 | 6.65E-08  | 14.45 | -0.29 | 2.35E-03  | 3.35  |
| 50                  | SERINC1   | NM_020755       | protein binding;L-serine transporter activity   | -0.89 | 8.05E-08  | 14.20 | -0.38 | 5.01E-03  | 2.34  |
| 51                  | HIPK1     | NM_198268       | protein serine/threonine kinase activity        | -0.76 | 8.10E-08  | 14.19 | -0.34 | 3.56E-03  | 2.79  |
| 52                  | C13orf24  | NM_006346       | unknown                                         | -0.78 | 8.21E-08  | 14.18 | -0.32 | 8.71E-03  | 1.62  |
| 53                  | TTC21A    | NM_145755       | binding                                         | -0.69 | 8.21E-08  | 14.18 | -0.43 | 1.84E-04  | 6.91  |
| 54                  | ERBB2IP   | NM_018695       | unknown                                         | -0.59 | 1.07E-07  | 13.84 | -0.42 | 4.78E-05  | 8.77  |
| 55                  | PDK1      | NM_002610       | protein histidine kinase activity               | -0.71 | 1.15E-07  | 13.75 | -0.35 | 1.88E-03  | 3.66  |
| 56                  | ZFX       | NM_003410       | transcription coactivator activity              | -0.62 | 1.29E-07  | 13.59 | -0.40 | 1.52E-04  | 7.19  |
| 57                  | CDON      | NM_016952       | protein binding                                 | -0.58 | 1.40E-07  | 13.48 | -0.26 | 5.14E-03  | 2.31  |
| 58                  | GYLTL1B   | NM_152312       | transferase activity                            | -0.59 | 1.86E-07  | 13.13 | -0.63 | 7.22E-07  | 14.42 |
| 59                  | TSC22D1   | NM_006022       | transcription factor activity                   | -0.69 | 2.10E-07  | 12.98 | -0.54 | 2.88E-05  | 9.49  |
| 60                  | C14orf172 | NM_152307       | unknown                                         | -0.67 | 2.29E-07  | 12.88 | -0.37 | 1.15E-03  | 4.32  |
| 61                  | VLDLR     | NM_003383       | receptor activity;lipid transporter activity    | -0.69 | 2.40E-07  | 12.82 | -0.56 | 2.08E-05  | 9.96  |
| 62                  | STX2      | NM_194356       | protein transporter activity                    | -0.65 | 3.40E-07  | 12.40 | -0.44 | 2.05E-04  | 6.77  |
| 63                  | CCDC71    | NM_022903       | unknown                                         | -0.66 | 3.46E-07  | 12.38 | -0.42 | 3.42E-04  | 6.00  |
| 64                  | OCRL      | NM_001587       | phosphatidylinositol phosphatase activity       | -0.59 | 4.10E-07  | 12.17 | -0.57 | 4.64E-06  | 11.90 |
| 65                  | ZBTB44    | NM_014155       | DNA binding;protein binding;zinc ion binding    | -0.61 | 4.70E-07  | 12.00 | -0.58 | 6.62E-06  | 11.44 |
| 66                  | GAB1      | NM_002039       | signal transducer activity                      | -0.58 | 4.76E-07  | 11.97 | -0.27 | 8.74E-03  | 1.62  |
| 67                  | SGTB      | NM_019072       | binding                                         | -0.64 | 5.65E-07  | 11.77 | -0.58 | 1.46E-05  | 10.42 |
| 68                  | ZNF587    | NM_032828       | DNA binding;zinc ion binding                    | -0.54 | 5.86E-07  | 11.73 | -0.37 | 2.89E-04  | 6.28  |

|     |          |                 |                                                    |       |          |       |       |          |       |
|-----|----------|-----------------|----------------------------------------------------|-------|----------|-------|-------|----------|-------|
| 69  | PTPRU    | NM_005704       | protein tyrosine phosphatase activity              | -0.87 | 6.22E-07 | 11.66 | -0.53 | 8.05E-04 | 4.81  |
| 70  | LMNB1    | NM_005573       | structural molecule activity                       | -0.61 | 7.58E-07 | 11.41 | -0.36 | 1.57E-07 | 3.91  |
| 71  | ARPP-19  | NM_006628       | potassium channel regulator activity               | -0.53 | 1.05E-06 | 11.00 | -0.63 | 9.50E-07 | 14.00 |
| 72  | CE170    | NM_014812       | unknown                                            | -0.50 | 1.07E-06 | 10.97 | -0.40 | 1.05E-04 | 7.72  |
| 73  | GHRHR    | NM_000823       | receptor activity                                  | -0.56 | 1.18E-06 | 10.84 | -0.49 | 3.51E-05 | 9.23  |
| 74  | SS18L1   | NM_198935       | protein binding                                    | -0.55 | 1.39E-06 | 10.65 | -0.67 | 1.00E-06 | 13.90 |
| 75  | TSTA3    | NM_003313       | electron carrier activity                          | -0.68 | 1.49E-06 | 10.57 | -0.51 | 2.32E-04 | 6.58  |
| 76  | ATAD5    | NM_024857       | nucleotide binding;ATP binding                     | -0.48 | 1.54E-06 | 10.53 | -0.29 | 1.92E-03 | 3.63  |
| 77  | SKP2     | NM_005983       | protein binding                                    | -0.52 | 1.65E-06 | 10.44 | -0.29 | 4.42E-03 | 2.51  |
| 78  | STAG2    | NM_006603       | component of cohesin complex                       | -0.63 | 1.65E-06 | 10.44 | -0.32 | 8.23E-03 | 1.69  |
| 79  | TRIM65   | NM_173547       | protein binding;zinc ion binding                   | -0.54 | 1.72E-06 | 10.39 | -0.52 | 2.08E-05 | 9.96  |
| 80  | RGPD5    | NM_005054       | binding                                            | -0.49 | 2.06E-06 | 10.16 | -0.47 | 2.04E-05 | 9.99  |
| 81  | RGPD7    | NM_032260       | binding                                            | -0.49 | 2.06E-06 | 10.16 | -0.47 | 2.04E-05 | 9.99  |
| 82  | MOBK1B   | NM_018221       | protein binding;zinc ion binding                   | -0.50 | 2.44E-06 | 9.94  | -0.38 | 3.42E-04 | 6.02  |
| 83  | ZFP64    | NM_199426       | nucleic acid binding;zinc ion binding              | -0.51 | 2.76E-06 | 9.78  | -0.47 | 4.23E-05 | 8.96  |
| 84  | C16orf63 | NM_144600       | unknown                                            | -0.49 | 2.93E-06 | 9.71  | -0.60 | 1.64E-06 | 13.25 |
| 85  | STCH     | NM_006948       | nucleotide binding;ATP binding                     | -0.48 | 3.04E-06 | 9.65  | -0.49 | 1.46E-05 | 10.42 |
| 86  | SLC25A32 | NM_030780       | folic acid transporter activity                    | -0.45 | 3.70E-06 | 9.41  | -0.38 | 1.32E-04 | 7.39  |
| 87  | PLXB2    | XM_371474       | receptor activity                                  | -0.49 | 3.84E-06 | 9.36  | -0.52 | 1.34E-05 | 10.54 |
| 88  | RREB1    | NM_002955       | nucleic acid binding;zinc ion binding              | -0.48 | 3.89E-06 | 9.35  | -0.50 | 1.48E-05 | 10.40 |
| 89  | SH3GL1   | NM_003025       | protein binding                                    | -0.71 | 4.07E-06 | 9.29  | -0.38 | 9.52E-03 | 1.50  |
| 90  | AKT1     | NM_005163       | protein serine/threonine kinase activity           | -0.46 | 4.25E-06 | 9.23  | -0.35 | 4.40E-04 | 5.67  |
| 91  | ATP6V0A2 | NM_012463       | hydrogen ion transporter activity                  | -0.49 | 4.27E-06 | 9.22  | -0.40 | 2.20E-04 | 6.67  |
| 92  | SCML2    | NM_006089       | transcription factor activity                      | -0.49 | 4.59E-06 | 9.13  | -0.44 | 9.13E-05 | 7.89  |
| 93  | ATP11A   | NM_015205       | magnesium ion binding;ATPase activity              | -0.48 | 5.19E-06 | 8.99  | -0.31 | 2.40E-03 | 3.32  |
| 94  | XPO7     | NM_015024       | nuclear export signal receptor activity            | -0.48 | 5.33E-06 | 8.96  | -0.47 | 3.60E-05 | 9.18  |
| 95  | ABCA2    | NM_001606       | ATPase activity                                    | -0.47 | 5.41E-06 | 8.94  | -0.29 | 4.57E-03 | 2.47  |
| 96  | TAF1     | NM_138923       | protein serine/threonine kinase activity           | -0.46 | 5.78E-06 | 8.85  | -0.35 | 5.45E-04 | 5.38  |
| 97  | PAPSS2   | NM_004670       | nucleotide binding;ATP binding                     | -0.46 | 7.18E-06 | 8.58  | -0.27 | 8.58E-03 | 1.64  |
| 98  | STX2     | NM_194356       | protein transporter activity                       | -0.47 | 7.78E-06 | 8.48  | -0.35 | 8.33E-04 | 4.75  |
| 99  | MIS12    | NM_024039       | protein binding                                    | -0.43 | 8.40E-06 | 8.39  | -0.36 | 3.42E-04 | 6.01  |
| 100 | ENDOGL1  | NM_005107       | endonuclease activity;hydrolase activity           | -0.45 | 9.50E-06 | 8.24  | -0.38 | 3.16E-04 | 6.12  |
| 101 | EIF4B    | NM_001417       | RNA binding;translation initiation factor activity | -0.44 | 9.51E-06 | 8.24  | -0.44 | 6.14E-05 | 8.45  |
| 102 | RBM3     | NM_006743       | nucleotide binding;RNA binding                     | -0.48 | 1.30E-05 | 7.86  | -0.45 | 1.21E-04 | 7.51  |
| 103 | TANC2    | XM_371074       | binding                                            | -0.41 | 1.35E-05 | 7.82  | -0.40 | 1.05E-04 | 7.71  |
| 104 | MIS12    | NM_024039       | protein binding                                    | -0.42 | 1.36E-05 | 7.81  | -0.47 | 2.51E-05 | 9.68  |
| 105 | FAM40B   | NM_020704       | hypothetical protein                               | -0.52 | 1.62E-05 | 7.59  | -0.69 | 3.42E-06 | 12.29 |
| 106 | SEL1L    | NM_005065       | binding                                            | -0.43 | 1.83E-05 | 7.44  | -0.26 | 1.04E-02 | 1.39  |
| 107 | SFXN1    | NM_022754       | protein binding;cation transporter activity        | -0.45 | 1.90E-05 | 7.39  | -0.72 | 3.87E-07 | 15.24 |
| 108 | TAF11    | NM_005643       | RNA polymerase II transcription factor activity    | -0.40 | 1.97E-05 | 7.35  | -0.65 | 3.38E-07 | 15.48 |
| 109 | PTPN21   | NM_007039       | protein tyrosine phosphatase activity              | -0.39 | 2.35E-05 | 7.14  | -0.35 | 2.92E-04 | 6.26  |
| 110 | LIN7C    | NM_018362       | protein binding                                    | -0.38 | 2.69E-05 | 6.97  | -0.36 | 2.34E-04 | 6.57  |
| 111 | KBTBD6   | NM_152903       | protein binding                                    | -0.40 | 3.05E-05 | 6.82  | -0.37 | 3.08E-04 | 6.17  |
| 112 | E2F7     | NM_203394       | transcription factor activity                      | -0.37 | 3.24E-05 | 6.75  | -0.24 | 8.83E-03 | 1.60  |
| 113 | ~        | ENSG00000170092 | unknown                                            | -0.38 | 3.58E-05 | 6.63  | -0.36 | 2.56E-04 | 6.45  |
| 114 | SSR3     | NM_007107       | signal sequence binding;protein binding            | -0.43 | 3.59E-05 | 6.63  | -0.31 | 3.88E-03 | 2.68  |
| 115 | ANKS6    | NM_173551       | unknown                                            | -0.42 | 3.60E-05 | 6.62  | -0.43 | 1.43E-04 | 7.28  |
| 116 | ERF      | NM_006494       | ligand-regulated transcription factor activity     | -0.39 | 3.68E-05 | 6.60  | -0.43 | 5.21E-05 | 8.66  |
| 117 | GSTCD    | NM_024751       | transferase activity                               | -0.42 | 3.83E-05 | 6.55  | -0.42 | 1.52E-04 | 7.18  |
| 118 | MCM4     | NM_005914       | DNA helicase activity; ATPase activity             | -0.39 | 4.15E-05 | 6.45  | -0.82 | 3.05E-08 | 18.61 |
| 119 | TAF11    | NM_005643       | RNA polymerase II transcription factor activity    | -0.40 | 4.44E-05 | 6.37  | -0.72 | 2.30E-07 | 16.02 |
| 120 | WDR45L   | NM_019613       | unknown                                            | -0.38 | 4.75E-05 | 6.29  | -0.47 | 2.49E-05 | 9.70  |
| 121 | UBQLN1   | NM_013438       | kinase binding                                     | -0.36 | 4.88E-05 | 6.26  | -0.44 | 2.57E-05 | 9.63  |
| 122 | STOM     | NM_004099       | integral to plasma membrane                        | -0.43 | 5.00E-05 | 6.23  | -0.93 | 3.10E-08 | 18.52 |
| 123 | DISP1    | NM_032890       | unknown                                            | -0.35 | 5.17E-05 | 6.19  | -0.31 | 8.48E-04 | 4.73  |
| 124 | C9orf97  | NM_139246       | unknown                                            | -0.38 | 5.23E-05 | 6.17  | -0.28 | 3.67E-03 | 2.75  |
| 125 | USP28    | NM_020886       | ubiquitin thiolesterase activity                   | -0.40 | 5.55E-05 | 6.10  | -0.44 | 9.58E-05 | 7.83  |
| 126 | LIN7C    | NM_018362       | protein binding                                    | -0.39 | 5.70E-05 | 6.06  | -0.39 | 2.44E-04 | 6.51  |
| 127 | PTPN14   | NM_005401       | protein tyrosine phosphatase activity              | -0.34 | 5.80E-05 | 6.04  | -0.26 | 3.07E-03 | 2.99  |
| 128 | FXC1     | NM_012192       | zinc ion binding                                   | -0.40 | 5.99E-05 | 6.00  | -0.43 | 1.32E-04 | 7.39  |
| 129 | ASCC3    | NM_006828       | ATP-dependent helicase activity                    | -0.45 | 6.21E-05 | 5.95  | -0.33 | 4.73E-03 | 2.42  |
| 130 | SDF4     | NM_016176       | calcium ion binding                                | -0.38 | 6.65E-05 | 5.88  | -0.30 | 2.78E-03 | 3.12  |
| 131 | ORAOV1   | NM_153451       | unknown                                            | -0.44 | 6.72E-05 | 5.86  | -0.57 | 2.15E-05 | 9.93  |
| 132 | NHN1     | NM_144604       | nucleic acid binding;zinc ion binding              | -0.43 | 7.09E-05 | 5.80  | -0.46 | 1.52E-04 | 7.18  |
| 133 | ~        | ENSG00000185636 | unknown                                            | -0.39 | 7.48E-05 | 5.74  | -0.39 | 2.99E-04 | 6.23  |
| 134 | SLC17A5  | NM_012434       | transporter activity                               | -0.39 | 7.75E-05 | 5.69  | -0.38 | 3.56E-04 | 5.94  |
| 135 | RABL3    | NM_173825       | transcription factor binding                       | -0.36 | 8.04E-05 | 5.65  | -0.27 | 4.34E-03 | 2.53  |
| 136 | TRPV1    | NM_018727       | ion transport                                      | -0.37 | 8.40E-05 | 5.60  | -0.31 | 1.70E-03 | 3.80  |
| 137 | PRR11    | NM_018304       | unknown                                            | -0.37 | 8.50E-05 | 5.58  | -0.59 | 1.94E-06 | 13.03 |
| 138 | NCOA4    | NM_005437       | regulation of transcription                        | -0.37 | 8.75E-05 | 5.55  | -0.38 | 2.95E-04 | 6.24  |
| 139 | TMTC3    | NM_181783       | binding                                            | -0.35 | 1.16E-04 | 5.21  | -0.35 | 4.58E-04 | 5.61  |

|     |           |                 |                                                    |       |          |      |       |          |       |
|-----|-----------|-----------------|----------------------------------------------------|-------|----------|------|-------|----------|-------|
| 140 | FLJ40142  | NM_207435       | unknown                                            | -0.42 | 1.19E-04 | 5.18 | -0.40 | 7.37E-04 | 4.93  |
| 141 | EML2      | NM_012155       | protein binding                                    | -0.35 | 1.30E-04 | 5.08 | -0.34 | 6.60E-04 | 5.10  |
| 142 | CLSPN     | NM_022111       | unknown                                            | -0.37 | 1.39E-04 | 5.00 | -0.47 | 4.61E-05 | 8.83  |
| 143 | SIX4      | NM_017420       | transcription factor activity                      | -0.36 | 1.40E-04 | 4.99 | -0.29 | 4.75E-03 | 2.42  |
| 144 | GSTCD     | NM_024751       | unknown                                            | -0.40 | 1.48E-04 | 4.93 | -0.46 | 1.41E-04 | 7.30  |
| 145 | CREB3L2   | NM_194071       | transcription factor activity                      | -0.35 | 1.49E-04 | 4.91 | -0.63 | 7.97E-07 | 14.30 |
| 146 | CLASP1    | NM_015282       | kinetochore binding;microtubule binding            | -0.40 | 1.90E-04 | 4.63 | -0.35 | 2.48E-03 | 3.28  |
| 147 | ~         | ENSG00000196393 | unknown                                            | -0.35 | 2.38E-04 | 4.35 | -0.29 | 4.10E-03 | 2.61  |
| 148 | ~         | ENSG00000203499 | unknown                                            | -0.35 | 2.62E-04 | 4.24 | -0.37 | 6.08E-04 | 5.22  |
| 149 | COX1      | NP_536845       | cytochrome c oxidase activity                      | -0.41 | 2.72E-04 | 4.19 | -1.29 | 1.38E-09 | 22.23 |
| 150 | PSMD2     | NM_002808       | protein binding                                    | -0.50 | 2.73E-04 | 4.29 | -0.76 | 4.51E-04 | 5.86  |
| 151 | ~         | XR_015437.1     | unknown                                            | -0.34 | 2.92E-04 | 4.11 | -0.42 | 1.20E-04 | 7.54  |
| 152 | TSC22D3   | NM_198057       | transcription factor activity                      | -0.44 | 3.26E-04 | 3.98 | -0.51 | 2.25E-04 | 6.63  |
| 153 | FOXJ3     | NM_014947       | transcription factor activity                      | -0.31 | 3.38E-04 | 3.94 | -0.33 | 5.33E-04 | 5.42  |
| 154 | LRRC23    | NM_201650       | protein binding                                    | -0.32 | 3.69E-04 | 3.83 | -0.52 | 6.86E-06 | 11.37 |
| 155 | ~         | ENSG00000197239 | unknown                                            | -0.37 | 3.81E-04 | 3.79 | -0.37 | 1.25E-03 | 4.21  |
| 156 | RBPS2     | NM_194272       | nucleotide binding                                 | -0.31 | 3.82E-04 | 3.79 | -0.49 | 1.30E-05 | 10.59 |
| 157 | ROBO1     | NM_002941       | unknown                                            | -0.38 | 3.89E-04 | 3.77 | -0.39 | 1.04E-03 | 4.46  |
| 158 | SLC30A6   | NM_017964       | zinc ion transporter activity                      | -0.34 | 4.49E-04 | 3.59 | -0.43 | 1.35E-04 | 7.36  |
| 159 | PXK       | NM_017771       | actin binding;phosphoinositide binding             | -0.30 | 4.78E-04 | 3.52 | -0.44 | 3.38E-05 | 9.28  |
| 160 | ZBT34     | XM_928961.2     | regulation of transcription                        | -0.29 | 5.09E-04 | 3.45 | -0.49 | 5.07E-06 | 11.80 |
| 161 | USP33     | NM_015017       | ubiquitin thiolesterase activity                   | -0.29 | 5.12E-04 | 3.44 | -0.35 | 2.86E-04 | 6.30  |
| 162 | CXorf34   | NM_024917       | methyltransferase activity                         | -0.40 | 5.64E-04 | 3.33 | -0.40 | 1.95E-03 | 3.60  |
| 163 | ZBTB24    | NM_014797       | DNA binding;protein binding                        | -0.37 | 5.80E-04 | 3.29 | -0.39 | 1.22E-03 | 4.25  |
| 164 | CARD14    | NM_024110       | protein binding;CARD domain binding                | -0.35 | 5.95E-04 | 3.26 | -0.36 | 1.36E-03 | 4.10  |
| 165 | HIST1H2AG | NM_021064       | DNA binding                                        | -0.31 | 6.14E-04 | 3.32 | -0.39 | 6.05E-03 | 2.39  |
| 166 | FANCE     | NM_021922       | protein binding                                    | -0.29 | 6.41E-04 | 3.17 | -0.29 | 2.11E-03 | 3.50  |
| 167 | PPP2R5B   | NM_006244       | protein phosphatase type 2A regulator activity     | -0.29 | 6.51E-04 | 3.15 | -0.33 | 5.41E-04 | 5.39  |
| 168 | BDP1      | NM_018429       | DNA binding;translation initiation factor activity | -0.31 | 6.91E-04 | 3.08 | -0.34 | 1.03E-03 | 4.47  |
| 169 | ACBD5     | NM_145698       | acyl-CoA binding;binding                           | -0.33 | 6.99E-04 | 3.07 | -0.45 | 1.14E-04 | 7.60  |
| 170 | B2L13     | NM_015367       | induction of apoptosis                             | -0.38 | 7.02E-04 | 3.06 | -0.36 | 3.31E-03 | 2.89  |
| 171 | KIAA1922  | XM_057040       | unknown                                            | -0.34 | 7.23E-04 | 3.03 | -0.36 | 9.78E-04 | 4.55  |
| 172 | RANBP2    | NM_006267       | peptidyl-prolyl cis-trans isomerase activity       | -0.33 | 7.38E-04 | 3.00 | -0.46 | 7.07E-05 | 8.26  |
| 173 | CDC14A    | NM_033313       | mitotic spindle regulation activity                | -0.31 | 7.85E-04 | 2.93 | -0.68 | 4.85E-07 | 15.00 |
| 174 | WNT5B     | NM_030775       | signal transducer activity;protein binding         | -0.33 | 7.89E-04 | 2.93 | -0.36 | 8.34E-04 | 4.75  |
| 175 | FKBP14    | NM_017946       | peptidyl-prolyl cis-trans isomerase activity       | -0.38 | 7.94E-04 | 2.92 | -0.54 | 8.29E-05 | 8.02  |
| 176 | ANGEL2    | NM_144567       | hypothetical protein                               | -0.32 | 8.35E-04 | 2.85 | -0.41 | 2.44E-04 | 6.51  |
| 177 | EEF1D     | NM_032378       | translation elongation factor activity             | -0.30 | 8.44E-04 | 2.84 | -0.28 | 4.27E-03 | 2.55  |
| 178 | CXorf56   | NP_071384       | protein binding                                    | -0.36 | 8.84E-04 | 2.79 | -0.97 | 4.07E-08 | 18.01 |
| 179 | ZNF430    | NM_025189       | DNA binding;zinc ion binding                       | -0.29 | 8.91E-04 | 2.78 | -0.40 | 1.14E-04 | 7.60  |
| 180 | Q6A1A2    | ENST00000382326 | kinase activity                                    | -0.42 | 9.26E-04 | 2.73 | -0.39 | 5.35E-03 | 2.25  |
| 181 | FAM73A    | NM_198549       | unknown                                            | -0.32 | 9.53E-04 | 2.70 | -0.28 | 9.11E-03 | 1.56  |
| 182 | CYP51A1   | NM_000786       | monooxygenase activity;iron ion binding            | -0.29 | 9.62E-04 | 2.69 | -0.62 | 8.18E-07 | 14.22 |
| 183 | LOC390414 | XR_015582       | unknown                                            | -0.32 | 9.67E-04 | 2.68 | -0.40 | 3.42E-04 | 6.02  |
| 184 | PPP2R5C   | NM_002719       | protein phosphatase type 2A regulator activity     | -0.31 | 1.02E-03 | 2.62 | -0.36 | 5.53E-04 | 5.36  |
| 185 | C20orf177 | NM_022106       | unknown                                            | -0.29 | 1.23E-03 | 2.40 | -0.29 | 3.31E-03 | 2.89  |
| 186 | HEAT1     | NM_018072       | protein binding                                    | -0.34 | 1.25E-03 | 2.38 | -0.60 | 1.11E-05 | 10.79 |
| 187 | ~         | ENSG00000196548 | unknown                                            | -0.31 | 1.33E-03 | 2.31 | -0.42 | 2.17E-04 | 6.68  |
| 188 | ~         | ENSG00000197187 | unknown                                            | -0.26 | 1.54E-03 | 2.13 | -0.38 | 1.14E-04 | 7.60  |
| 189 | HIAL2     | NR_002894       | transporter activity                               | -0.29 | 1.68E-03 | 2.04 | -0.34 | 8.53E-04 | 4.72  |
| 190 | TBP       | NM_003194       | RNA polymerase II transcription factor activity    | -0.74 | 1.76E-03 | 2.42 | -0.68 | 2.32E-03 | 3.62  |
| 191 | GTF2H3    | NM_001516       | transcription factor activity                      | -0.33 | 1.88E-03 | 1.90 | -0.41 | 5.98E-04 | 5.24  |
| 192 | UTY       | NM_182660       | unknown                                            | -0.29 | 1.91E-03 | 1.88 | -0.30 | 3.46E-03 | 2.83  |
| 193 | SNX12     | NM_013346       | sorting nexin family                               | -0.30 | 2.03E-03 | 1.81 | -0.51 | 2.56E-05 | 9.64  |
| 194 | Q8WUS3    | ENSG00000198596 | unknown                                            | -0.31 | 2.12E-03 | 1.76 | -0.35 | 1.53E-03 | 3.94  |
| 195 | TNKS1BP1  | NM_033396       | enzyme binding;ankyrin binding                     | -0.36 | 2.25E-03 | 1.68 | -0.37 | 4.39E-03 | 2.52  |
| 196 | RIR2      | NM_001034       | DNA replication                                    | -0.28 | 2.28E-03 | 1.67 | -0.40 | 1.85E-04 | 6.90  |
| 197 | SMC5      | NM_015110.2     | DNA repair                                         | -0.27 | 2.29E-03 | 1.66 | -0.34 | 5.45E-04 | 5.38  |
| 198 | SS18      | NM_005637       | unknown                                            | -0.40 | 2.31E-03 | 1.65 | -0.40 | 5.46E-03 | 2.22  |
| 199 | ~         | ENSG00000198069 | unknown                                            | -0.30 | 2.36E-03 | 1.63 | -0.40 | 4.36E-04 | 5.68  |
| 200 | LATS1     | NM_004690       | protein serine/threonine kinase activity           | -0.27 | 2.48E-03 | 1.57 | -0.28 | 4.15E-03 | 2.59  |
| 201 | UTX       | NM_021140       | binding                                            | -0.25 | 2.59E-03 | 1.52 | -0.25 | 6.37E-03 | 2.03  |
| 202 | AURKA     | NM_198433       | protein serine/threonine kinase activity           | -0.30 | 2.62E-03 | 1.50 | -0.33 | 2.50E-03 | 3.27  |
| 203 | ARNT      | NM_001668       | signal transduction                                | -0.28 | 2.80E-03 | 1.43 | -0.38 | 4.39E-04 | 5.67  |
| 204 | ARID1A    | NM_006015       | transcriptional activator activity                 | -0.25 | 2.82E-03 | 1.42 | -0.77 | 3.65E-08 | 18.27 |
| 205 | PIP5K1A   | NM_003557       | kinase activity                                    | -0.37 | 2.86E-03 | 1.41 | -0.66 | 2.04E-05 | 9.99  |
| 206 | UMPS      | NM_000373       | transferase activity                               | -0.30 | 2.88E-03 | 1.40 | -0.34 | 2.69E-03 | 3.17  |
| 207 | VIPR2     | NM_003382       | receptor activity                                  | -0.45 | 3.40E-03 | 1.45 | -0.46 | 6.52E-03 | 2.20  |
