# Supplementary material for: Off-target effects of siRNA specific for GFP
Source: PubMed Central journal article supplement (PMC2443166; doi:10.1186/1471-2199-9-60), 2008-06-24

# # of homologies in significantly down regulated genes

>7bp

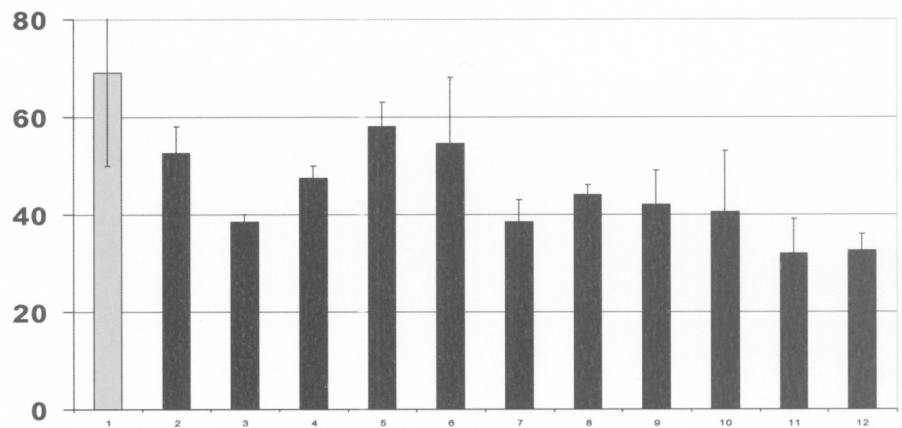

>8bp

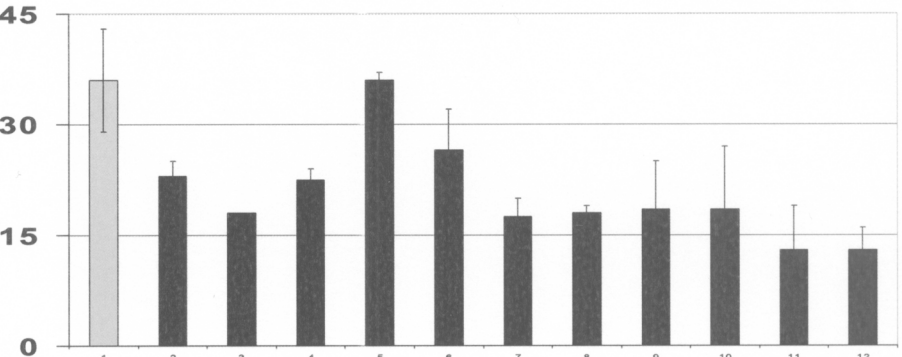

>9bp

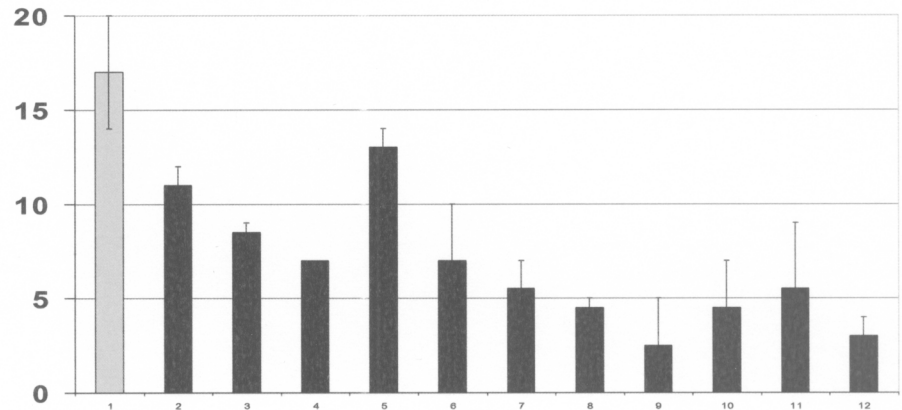

>10bp

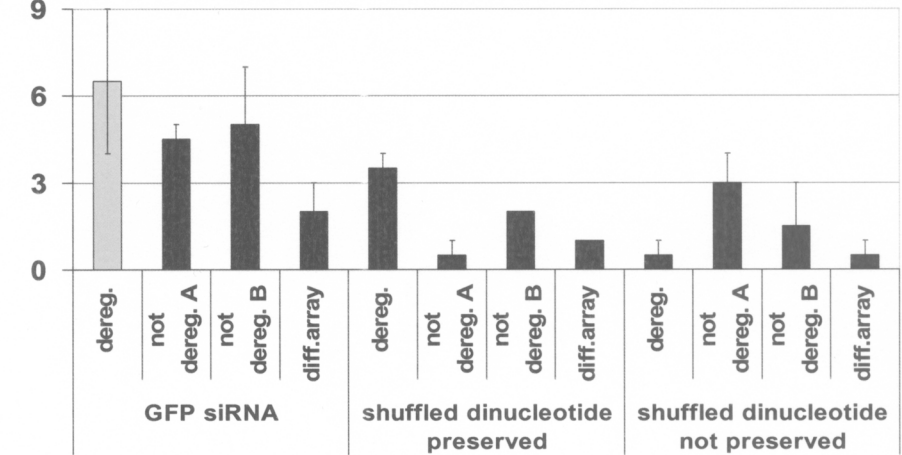

Supplement: 1471-2199-9-60-S3.pdf [file 1471-2199-9-60-S3.pdf]
